# Supplementary material
Source: PubMed Central journal article supplement (PMC10231649)
Supplement: NIHMS984504-supplement-Supp_FigS2.pdf [file NIHMS984504-supplement-Supp_FigS2.pdf]

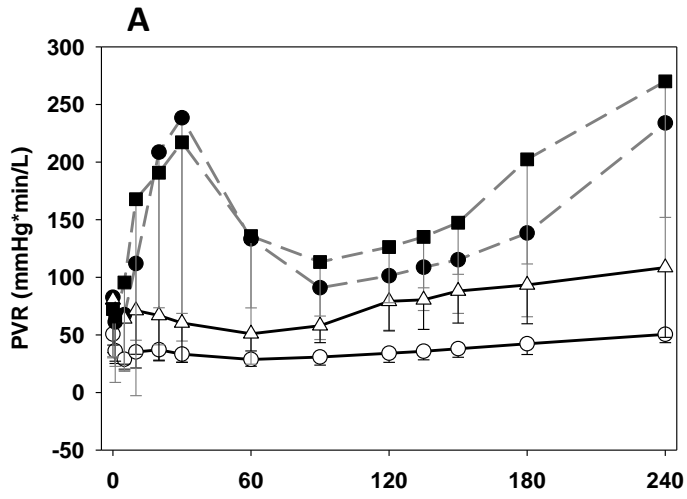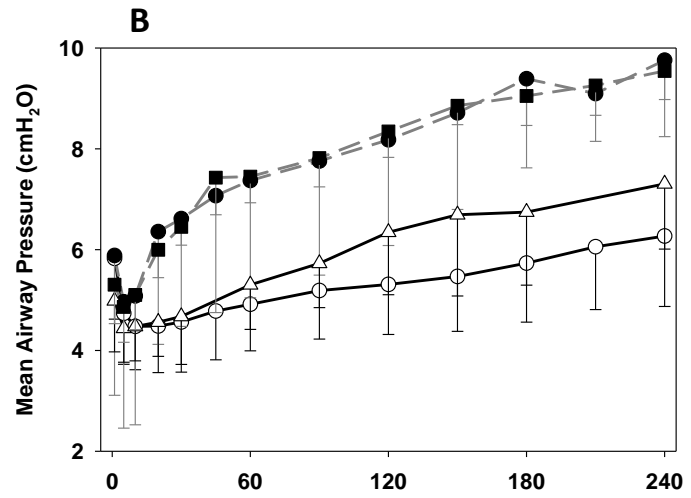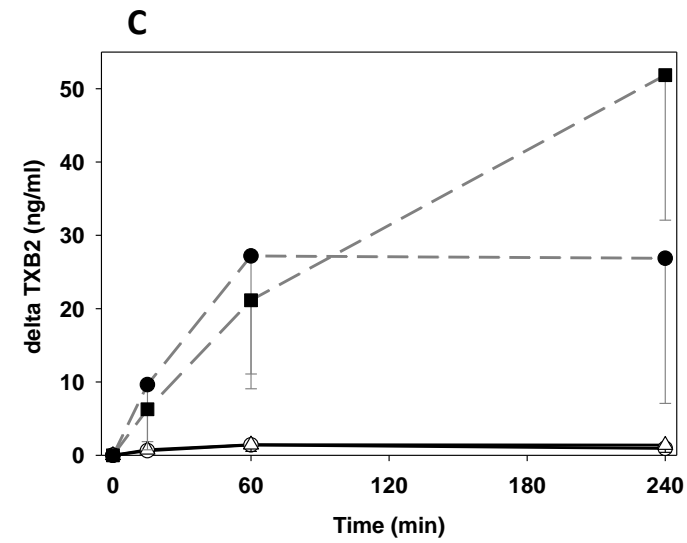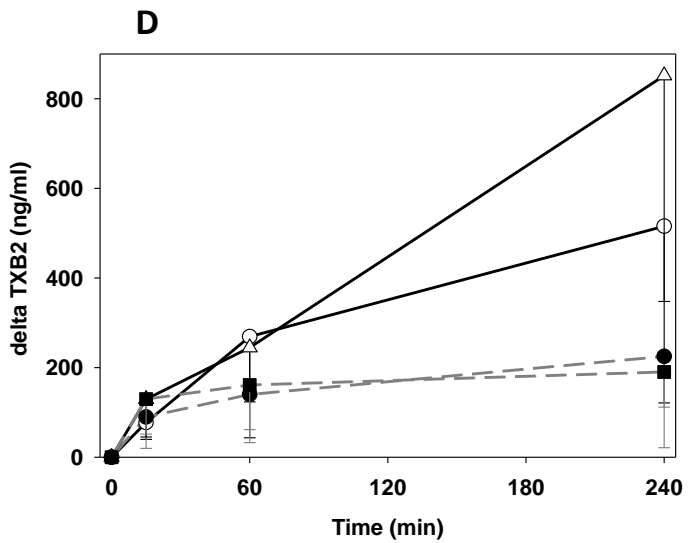

- △— GalTKO.hCD46 + 1-BIA/Famotidine
- GalTKO.hCD46.hCD55 + 1-BIA/Famotidine
- GalTKO.hCD46 untreated
- GalTKO.hCD46.hCD55 untreated
