# Supplementary material
Source: PubMed Central journal article supplement (PMC10231649)

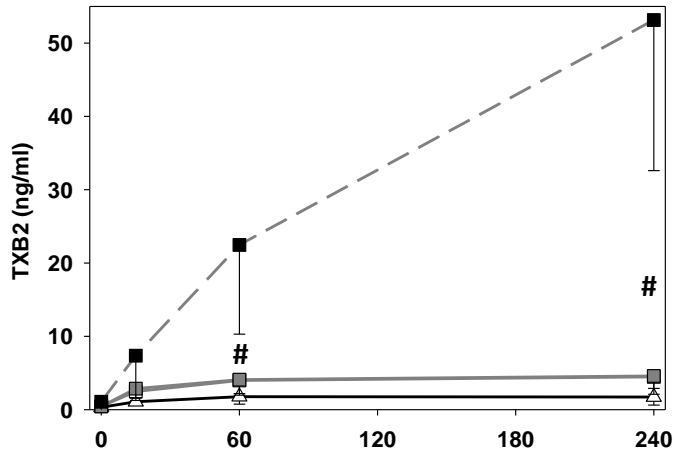

**B**

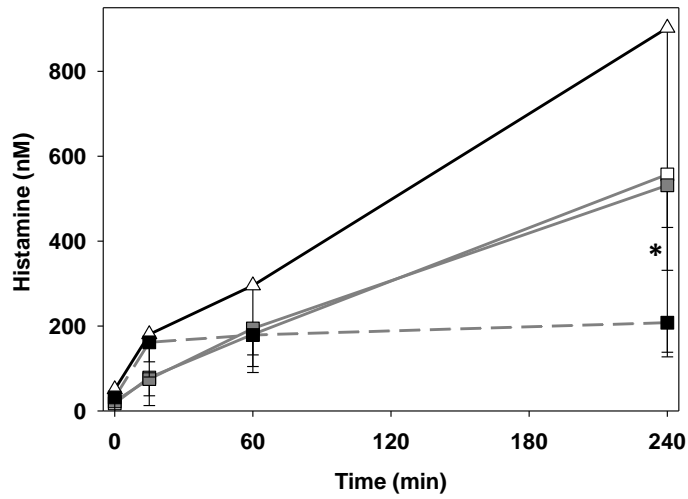

- △— 1-BIA/Famotidine treated
- 1-BIA/Diphenhydramine treated
- 1-BIA treated
- untreated

Supplement: NIHMS984504-supplement-Supp_FigS1.pdf [file NIHMS984504-supplement-Supp_FigS1.pdf]
